# Supplementary material for: Mapping of Public Approach towards COVID-19 Vaccine for Preparedness and Resilience of Emerging Threats to Facilitate Cross-Country Systematic Roll-Out of Resources
Source: Preprints.org preprint supplement (doi:10.20944/preprints202402.1366.v2), 2024-03-27
Supplement: Supplementary file 1 [file supplementary]

**Supplementary file/Metadata-**Cumulative Coverage Report of COVID-19 vaccination is taken from the Ministry of Health and Family Welfare (MoHFW), Government of India. **<https://www.mohfw.gov.in/pdf/CummulativeCovidVaccinationReport23Dec2022.pdf>**

**Table 1-Cumulative coverage report of COVID-19 vaccination in entire India-**

| **India** | **Beneficiaries Vaccinated** | | | | | | | | | | | | **Total doses** |
| --- | --- | --- | --- | --- | --- | --- | --- | --- | --- | --- | --- | --- | --- |
| **18+ population** | | | **15-18 years** | | | **12-14 years** | | | **Precaution/booster dose** | | |
| **1st dose** | **2nd dose** | **Difference** | **1st dose** | **2nd dose** | **Difference** | **1st dose** | **2nd dose** | **Difference** | **18-59 years** | **60 + years HCW, FLW** | **Total booster doses** |
| 922150302 | 865073869 | 57076433 | 62111781 | 53629741 | 8482040 | 41288312 | 32518122 | 8770190 | 153962383 | 69565391 | 223527774 | 2200299901 |

**Table 2-Cumulative coverage report of COVID-19 vaccination in the northern region of India-**

| **S. No** | **State** | **Beneficiaries Vaccinated** | | | | | | | | | | | | **Total doses** |
| --- | --- | --- | --- | --- | --- | --- | --- | --- | --- | --- | --- | --- | --- | --- |
| **18+ population** | | | **15-18 years** | | | **12-14 years** | | | **Precaution/booster dose** | | |
| **1st dose** | **2nd dose** | **Difference** | **1st dose** | **2nd dose** | **Difference** | **1st dose** | **2nd dose** | **Difference** | **18-59 years** | **60 + years HCW, FLW** | **Total booster doses** |  |
| 1 | Himachal Pradesh | 6041524 | 5779764 | 261760 | 331637 | 308731 | 22906 | 272064 | 235002 | 37062 | 1480474 | 822929 | 2303403 | 15272125 |
| 2 | Punjab | 22351896 | 19601010 | 2750886 | 1116705 | 874903 | 241802 | 684126 | 497377 | 186749 | 794809 | 1039692 | 1834501 | 46960518 |
| 3 | Uttarakhand | 8179978 | 7940252 | 239726 | 532593 | 466493 | 66100 | 402309 | 315984 | 86325 | 1341674 | 866468 | 2208142 | 20045751 |
| 4 | Haryana | 21954733 | 18731652 | 3223081 | 1157529 | 767491 | 390038 | 559418 | 327204 | 232214 | 1249641 | 700969 | 1950610 | 45448637 |
| 5 | Delhi | 16599587 | 14348233 | 2251354 | 1008405 | 870305 | 138100 | 682753 | 489523 | 193230 | 2307012 | 1052355 | 3359367 | 37358173 |
| 6 | Uttar Pradesh | 154054737 | 147709294 | 6345443 | 14192132 | 13221527 | 970605 | 8708556 | 7874893 | 833663 | 35581131 | 9235711 | 44816842 | 390577981 |

**Table 3-Cumulative coverage report of COVID-19 vaccination in the southern region of India-**

| **S. No** | **State** | **Beneficiaries Vaccinated** | | | | | | | | | | | | **Total doses** |
| --- | --- | --- | --- | --- | --- | --- | --- | --- | --- | --- | --- | --- | --- | --- |
| **18+ population** | | | **15-18 years** | | | **12-14 years** | | | **Precaution/booster dose** | | |
| **1st dose** | **2nd dose** | **Difference** | **1st dose** | **2nd dose** | **Difference** | **1st dose** | **2nd dose** | **Difference** | **18-59 years** | **60 + years HCW, FLW** | **Total booster doses** |  |
| 1 | Andhra Pradesh | 40642902 | 43548909 | -2906007 | 2535297 | 2527591 | 7706 | 1523355 | 1495429 | 27926 | 11700256 | 6579067 | 18279323 | 110552806 |
| 2 | Karnataka | 50014221 | 50452205 | -437984 | 2814308 | 2709721 | 104587 | 2324463 | 2149980 | 174483 | 5644638 | 4717480 | 10362118 | 120827016 |
| 3 | Kerala | 27013330 | 23790740 | 3222590 | 1322406 | 956252 | 366154 | 810901 | 511928 | 298973 | 850965 | 2215064 | 3066029 | 57471586 |
| 4 | Tamil Nadu | 56657297 | 53494530 | 3162767 | 2627003 | 2221961 | 405042 | 1916056 | 1460282 | 455774 | 6024065 | 3019271 | 9043336 | 127420465 |
| 5 | Telangana | 29606569 | 29051472 | 555097 | 1723557 | 1580580 | 142977 | 1106831 | 900504 | 206327 | 10512313 | 2700120 | 13212433 | 77181946 |

**Table 4-Cumulative coverage report of COVID-19 vaccination in the eastern region of India-**

| **S. No** | **State** | **Beneficiaries Vaccinated** | | | | | | | | | | | | **Total doses** |
| --- | --- | --- | --- | --- | --- | --- | --- | --- | --- | --- | --- | --- | --- | --- |
| **18+ population** | | | **15-18 years** | | | **12-14 years** | | | **Precaution/booster dose** | | |
| **1st dose** | **2nd dose** | **Difference** | **1st dose** | **2nd dose** | **Difference** | **1st dose** | **2nd dose** | **Difference** | **18-59 years** | **60 + years HCW, FLW** | **Total booster doses** |  |
| 1 | Bihar | 62942587 | 59142450 | 3800137 | 6227260 | 5329417 | 897843 | 4287681 | 3402619 | 885062 | 11975634 | 3867313 | 15842947 | 157174961 |
| 2 | Jharkhand | 21297837 | 16037741 | 5260096 | 1586108 | 1091508 | 494600 | 1062295 | 621850 | 440445 | 1291246 | 662290 | 1953536 | 43650875 |
| 3 | Odisha | 31453540 | 29949586 | 1503954 | 2195508 | 1844375 | 351133 | 1600839 | 1206527 | 394312 | 9991894 | 3199032 | 13190926 | 81441301 |
| 4 | West Bengal | 67299545 | 61592577 | 5706968 | 3599204 | 3038845 | 560359 | 2621997 | 2058910 | 563087 | 10245585 | 5489990 | 15735575 | 155946653 |

**Table 5-Cumulative coverage report of COVID-19 vaccination in the western region of India-**

| **S. No** | **State** | **Beneficiaries Vaccinated** | | | | | | | | | | | | **Total doses** |
| --- | --- | --- | --- | --- | --- | --- | --- | --- | --- | --- | --- | --- | --- | --- |
| **18+ population** | | | **15-18 years** | | | **12-14 years** | | | **Precaution/booster dose** | | |
| **1st dose** | **2nd dose** | **Difference** | **1st dose** | **2nd dose** | **Difference** | **1st dose** | **2nd dose** | **Difference** | **18-59 years** | **60 + years HCW, FLW** | **Total booster doses** |  |
| 1 | Rajasthan | 51101129 | 46504169 | 4596960 | 3570406 | 2905664 | 664742 | 2343781 | 1496486 | 847295 | 4362850 | 2993986 | 7356836 | 115278471 |
| 2 | Maharashtra | 84640930 | 71589342 | 13051588 | 4110678 | 3091658 | 1019020 | 2888879 | 1868124 | 1020755 | 4986703 | 4444638 | 9431341 | 177620952 |
| 3 | Gujrat | 49312972 | 49426218 | -113246 | 3131238 | 2903246 | 227992 | 1940872 | 1677615 | 263257 | 13419812 | 5931642 | 19351454 | 127743615 |
| 4 | Goa | 1354815 | 1224166 | 130649 | 51727 | 44546 | 7181 | 33265 | 26639 | 6626 | 60755 | 76549 | 137304 | 2872462 |

**Table 6-Cumulative coverage report of COVID-19 vaccination in the central region of India-**

| **S. No** | **State** | **Beneficiaries Vaccinated** | | | | | | | | | | | | **Total doses** |
| --- | --- | --- | --- | --- | --- | --- | --- | --- | --- | --- | --- | --- | --- | --- |
| **18+ population** | | | **15-18 years** | | | **12-14 years** | | | **Precaution/booster dose** | | |
| **1st dose** | **2nd dose** | **Difference** | **1st dose** | **2nd dose** | **Difference** | **1st dose** | **2nd dose** | **Difference** | **18-59 years** | **60 + years HCW, FLW** | **Total booster doses** |  |
| 1 | Chhattisgarh | 18954784 | 18532212 | 422572 | 1234608 | 1050135 | 184473 | 1076048 | 752552 | 323496 | 5724368 | 1803871 | 7528239 | 49128578 |
| 2 | Madhya Pradesh | 54139637 | 54034786 | 104851 | 4194075 | 3469035 | 725040 | 2410903 | 1698621 | 712282 | 9846394 | 3786020 | 13632414 | 133579471 |

**Table 7-Cumulative coverage report of COVID-19 vaccination in north-east region of India-**

| **S. No** | **State** | **Beneficiaries Vaccinated** | | | | | | | | | | | | **Total doses** |
| --- | --- | --- | --- | --- | --- | --- | --- | --- | --- | --- | --- | --- | --- | --- |
| **18+ population** | | | **15-18 years** | | | **12-14 years** | | | **Precaution/booster dose** | | |
| **1st dose** | **2nd dose** | **Difference** | **1st dose** | **2nd dose** | **Difference** | **1st dose** | **2nd dose** | **Difference** | **18-59 years** | **60 + years HCW, FLW** | **Total booster doses** |  |
| 1 | Arunachal Pradesh | 860420 | 747123 | 113297 | 59080 | 44796 | 14284 | 40792 | 28406 | 12386 | 72076 | 58524 | 130600 | 1911217 |
| 2 | Assam | 22549847 | 20561284 | 1988563 | 1261430 | 965279 | 296151 | 999552 | 602277 | 397275 | 2081769 | 1259676 | 3341445 | 50281114 |
| 3 | Manipur | 1463972 | 1225590 | 238382 | 109282 | 68171 | 41111 | 75418 | 44329 | 31089 | 113999 | 165096 | 279095 | 3265857 |
| 4 | Meghalaya | 1332102 | 1024901 | 307201 | 76875 | 42605 | 34270 | 37364 | 19512 | 17852 | 30704 | 56987 | 87691 | 2621050 |
| 5 | Mizoram | 785749 | 668814 | 116935 | 60098 | 47010 | 13088 | 48360 | 33595 | 14765 | 79573 | 67619 | 147192 | 1790818 |
| 6 | Nagaland | 837775 | 684305 | 153470 | 59731 | 40145 | 19586 | 26012 | 19885 | 6127 | 26060 | 43640 | 69700 | 1737553 |
| 7 | Sikkim | 539927 | 509134 | 30793 | 30049 | 26515 | 3534 | 21899 | 19007 | 2892 | 158276 | 55637 | 213913 | 1360444 |
| 8 | Tripura | 2658796 | 2328462 | 330334 | 144797 | 115099 | 29698 | 112965 | 79612 | 33353 | 270651 | 204535 | 475186 | 5914917 |

**Table 8-Cumulative coverage report of COVID-19 vaccination in union territories of India-**

| **S. No** | **State** | **Beneficiaries Vaccinated** | | | | | | | | | | | | **Total doses** |
| --- | --- | --- | --- | --- | --- | --- | --- | --- | --- | --- | --- | --- | --- | --- |
| **18+ population** | | | **15-18 years** | | | **12-14 years** | | | **Precaution/booster dose** | | |
| **1st dose** | **2nd dose** | **Difference** | **1st dose** | **2nd dose** | **Difference** | **1st dose** | **2nd dose** | **Difference** | **18-59 years** | **60 + years HCW, FLW** | **Total booster doses** |  |
| 1 | Andaman and Nicobar Islands | 313284 | 320383 | -7099 | 19208 | 18860 | 348 | 15124 | 14041 | 1083 | 236936 | 53427 | 290363 | 991263 |
| 2 | Chandigarh | 1089211 | 917560 | 171651 | 57635 | 42055 | 15580 | 38117 | 25941 | 12176 | 48174 | 62852 | 111026 | 2281545 |
| 3 | Dadra & Nagar Haveli | 430279 | 332452 | 97827 | 19655 | 16329 | 3326 | 12365 | 7989 | 4376 | 69607 | 10342 | 79949 | 899018 |
| 4 | Daman & Diu | 300463 | 262473 | 37990 | 11852 | 10612 | 1240 | 7623 | 6937 | 686 | 67317 | 12142 | 79459 | 679419 |
| 5 | Lakshadweep | 56908 | 55992 | 916 | 2911 | 2780 | 131 | 1988 | 1723 | 265 | 15757 | 6949 | 22706 | 145008 |
| 6 | Ladakh | 219560 | 186920 | 32640 | 10068 | 9228 | 840 | 8627 | 7758 | 869 | 68544 | 53920 | 122464 | 564625 |
| 7 | Jammu & Kashmir | 9941538 | 10386743 | -445205 | 876032 | 861659 | 14373 | 553841 | 517810 | 36031 | 928479 | 669391 | 1597870 | 24735493 |
| 8 | Puducherry | 912821 | 801311 | 111510 | 50694 | 44614 | 6080 | 30873 | 21251 | 9622 | 302242 | 106698 | 408940 | 2270504 |

**Table 9-Cumulative coverage report of COVID-19 vaccination miscellaneous-**

| **S. No** | **State** | **Beneficiaries Vaccinated** | | | | | | | | | | | | **Total doses** |
| --- | --- | --- | --- | --- | --- | --- | --- | --- | --- | --- | --- | --- | --- | --- |
| **18+ population** | | | **15-18 years** | | | **12-14 years** | | | **Precaution/booster dose** | | |
| **1st dose** | **2nd dose** | **Difference** | **1st dose** | **2nd dose** | **Difference** | **1st dose** | **2nd dose** | **Difference** | **18-59 years** | **60 + years HCW, FLW** | **Total booster doses** |  |
| 1 | Miscellaneous | 2243100 | 1579114 |  |  |  |  |  |  |  |  | 1473499 |  | 5295713 |
|  |  |  |  |  |  |  |  |  |  |  |  |  |  |  |

***************************************************************************
